# Supplementary material for: Influence of Polymer Concentration on Drying of SPION Dispersions by Electrospinning
Source: MDPI journal article supplement (doi:10.3390/pharmaceutics15061619), 2023-05-30
Supplement: s1 [file s1]

# Influence of Polymer Concentration on Drying of SPION Dispersions by Electrospinning

Črt Dragar <sup>1</sup>, Žan Rekar <sup>1</sup>, Tanja Potrč <sup>1</sup>, Sebastjan Nemec <sup>1,2</sup>, Slavko Kralj <sup>1,2,3</sup> and Petra Kocbek <sup>1,\*</sup>

<sup>1</sup> Department of Pharmaceutical Technology, Faculty of Pharmacy, University of Ljubljana, SI-1000 Ljubljana, Slovenia; crt.dragar@ffa.uni-lj.si (Č.D.); tanja.potrc@ffa.uni-lj.si (T.P.); sebastjan.nemec@ijs.si (S.N.); slavko.kralj@ijs.si (S.K.)

<sup>2</sup> Department for Materials Synthesis, Jožef Stefan Institute, SI-1000 Ljubljana, Slovenia

<sup>3</sup> Nanos SCI, Nanos Scientifcae d.o.o, Ljubljana, SI-1000, Slovenia

\* Correspondence: petra.kocbek@ffa.uni-lj.si

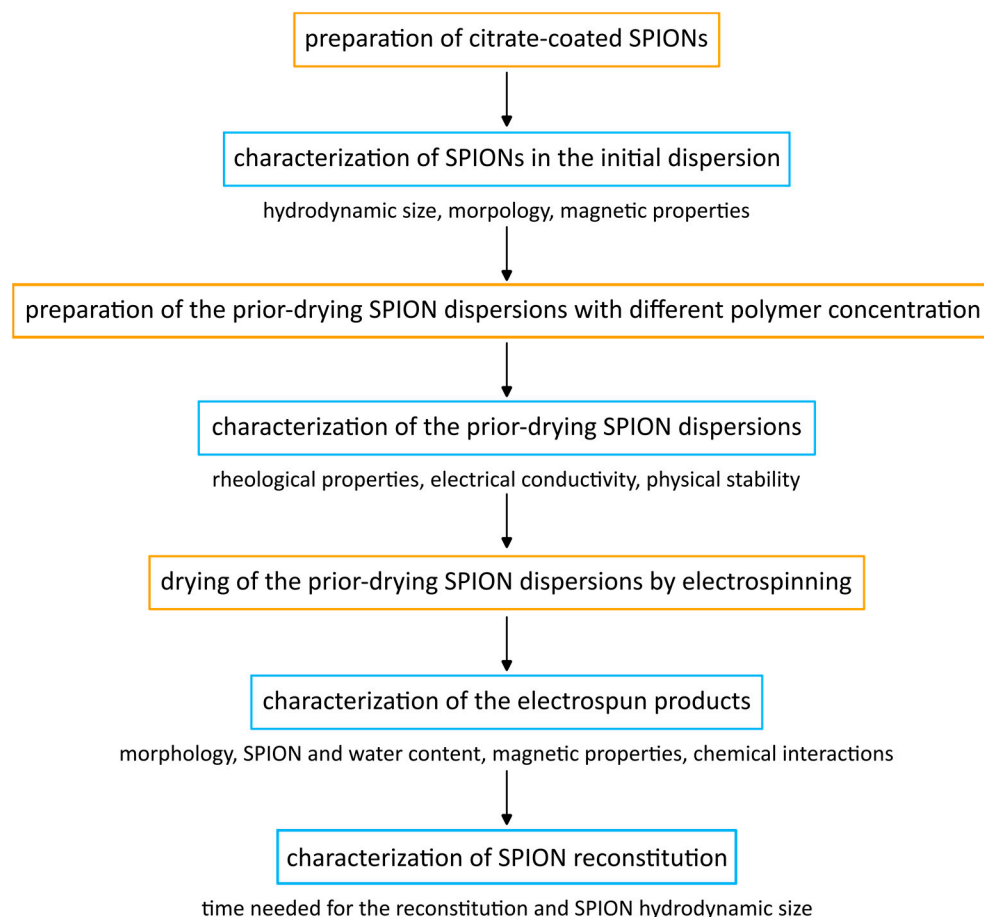

**Figure S1.** Schematic workflow of the overall work.

**Table S1.** Composition of the prior-drying SPION dispersions (preliminary experiments).

| Formulation | w <sub>SPIONs</sub> (in the product) [/] | SPIONs [mg] | PEO [mg] | P188 [mg] | Water [mL] |
|-------------|------------------------------------------|-------------|----------|-----------|------------|
| 1           | 0.50                                     | 84          | 42       | 42        | 3.5        |
| 2           | 0.55                                     | 103         | 42       | 42        | 3.5        |
| 3           | 0.60                                     | 126         | 42       | 42        | 3.5        |
| 4           | 0.65                                     | 156         | 42       | 42        | 3.5        |
| 5           | 0.70                                     | 196         | 42       | 42        | 3.5        |
| 6           | 0.75                                     | 252         | 42       | 42        | 3.5        |
| 7           | 0.80                                     | 336         | 42       | 42        | 3.5        |

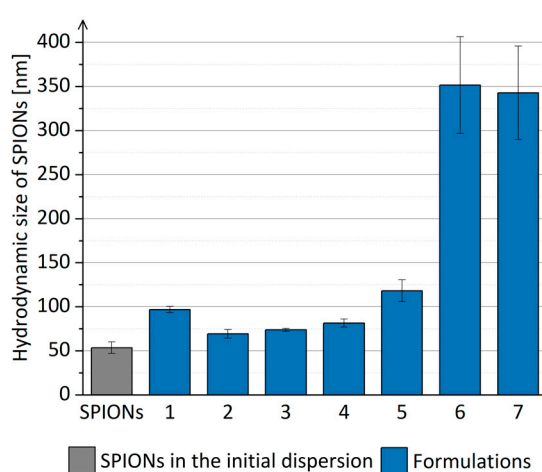**Figure S2.** The hydrodynamic size of SPIONs after their reconstitution from the electrospun products compared to SPIONs in the initial dispersion (preliminary experiments).

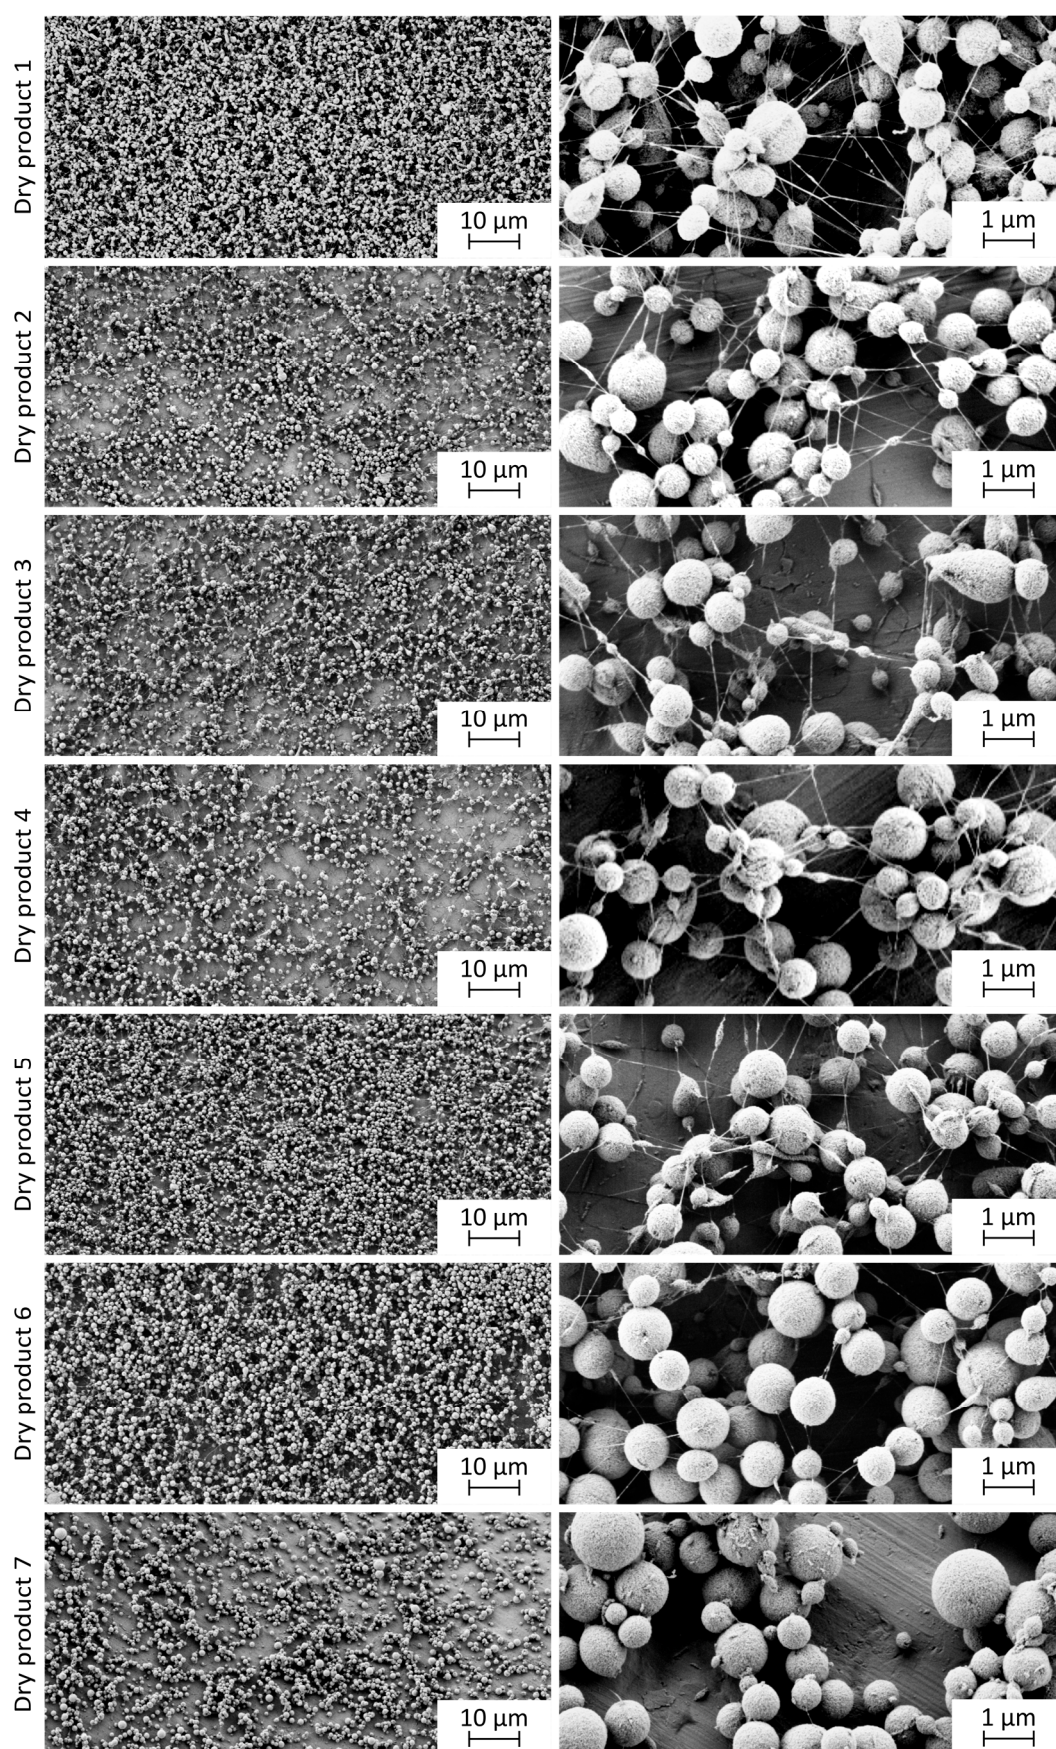

**Figure S3.** Representative SEM images of electrospun products (preliminary experiments) at lower (left) and higher (right) magnification.

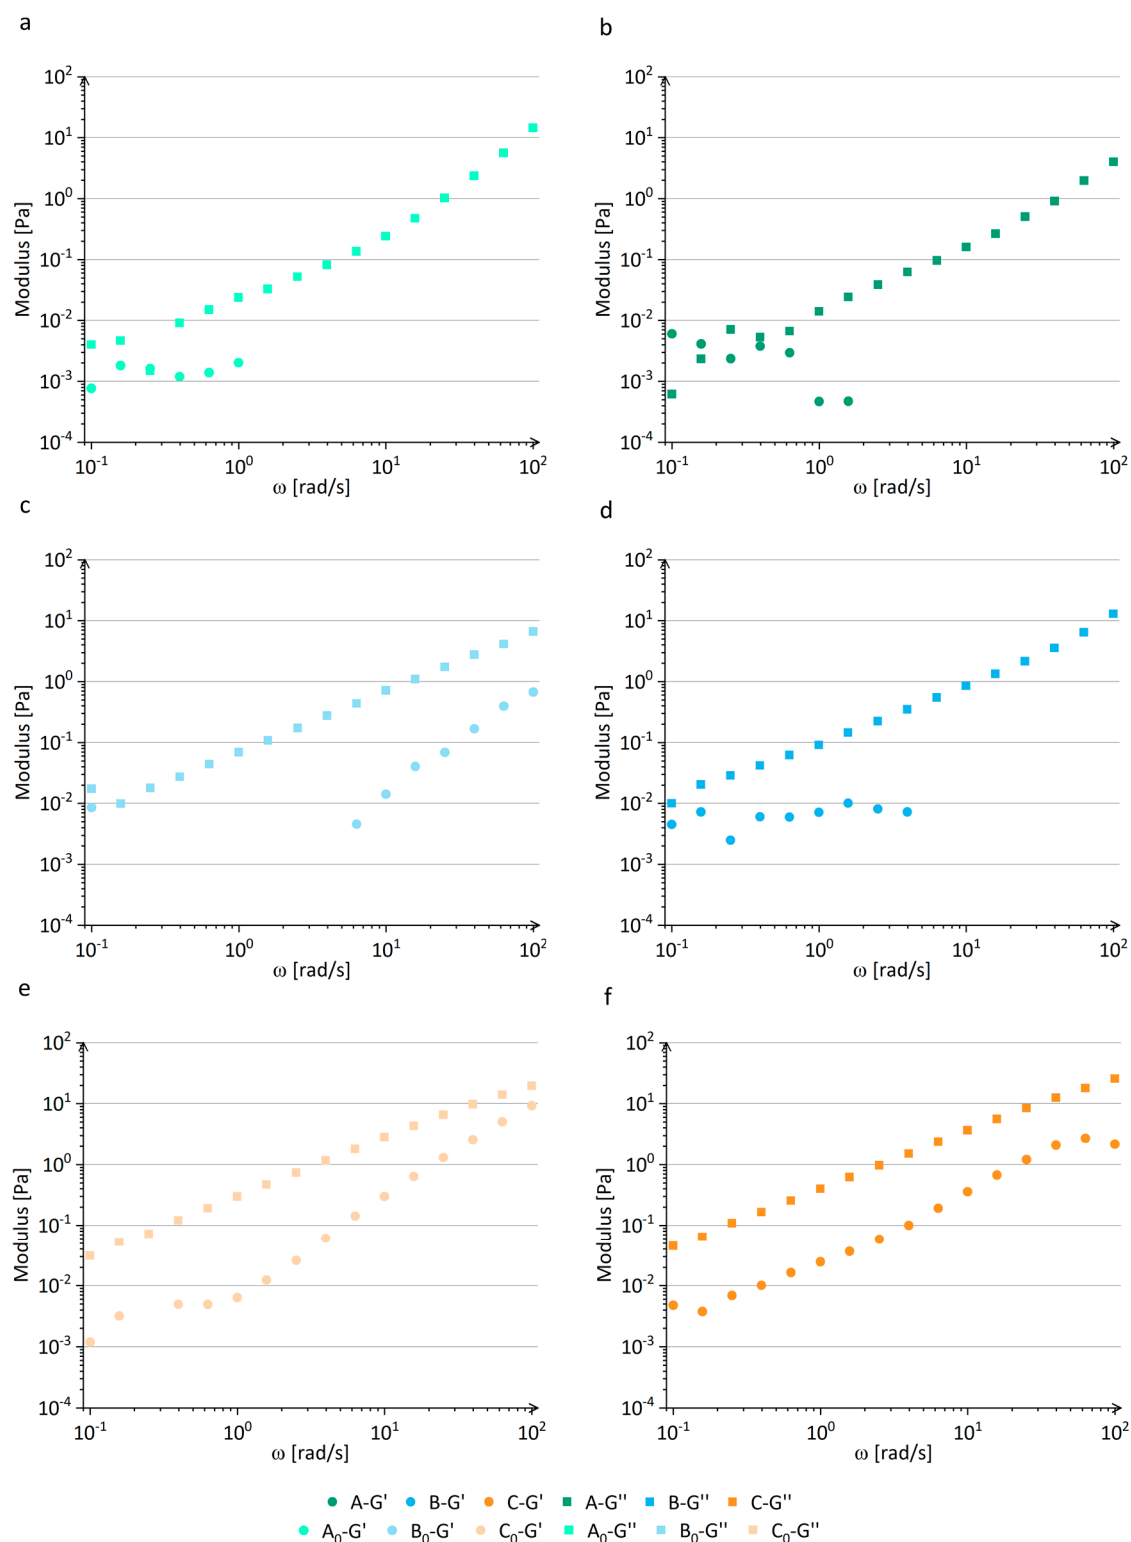

**Figure S4.** Plastic ( $G''$ ) and elastic ( $G'$ ) modulus of prior-drying samples of (a) formulation A<sub>0</sub>, (b) formulation A, (c) formulation B<sub>0</sub>, (d) formulation B, (e) formulation C<sub>0</sub>, and (f) formulation C.

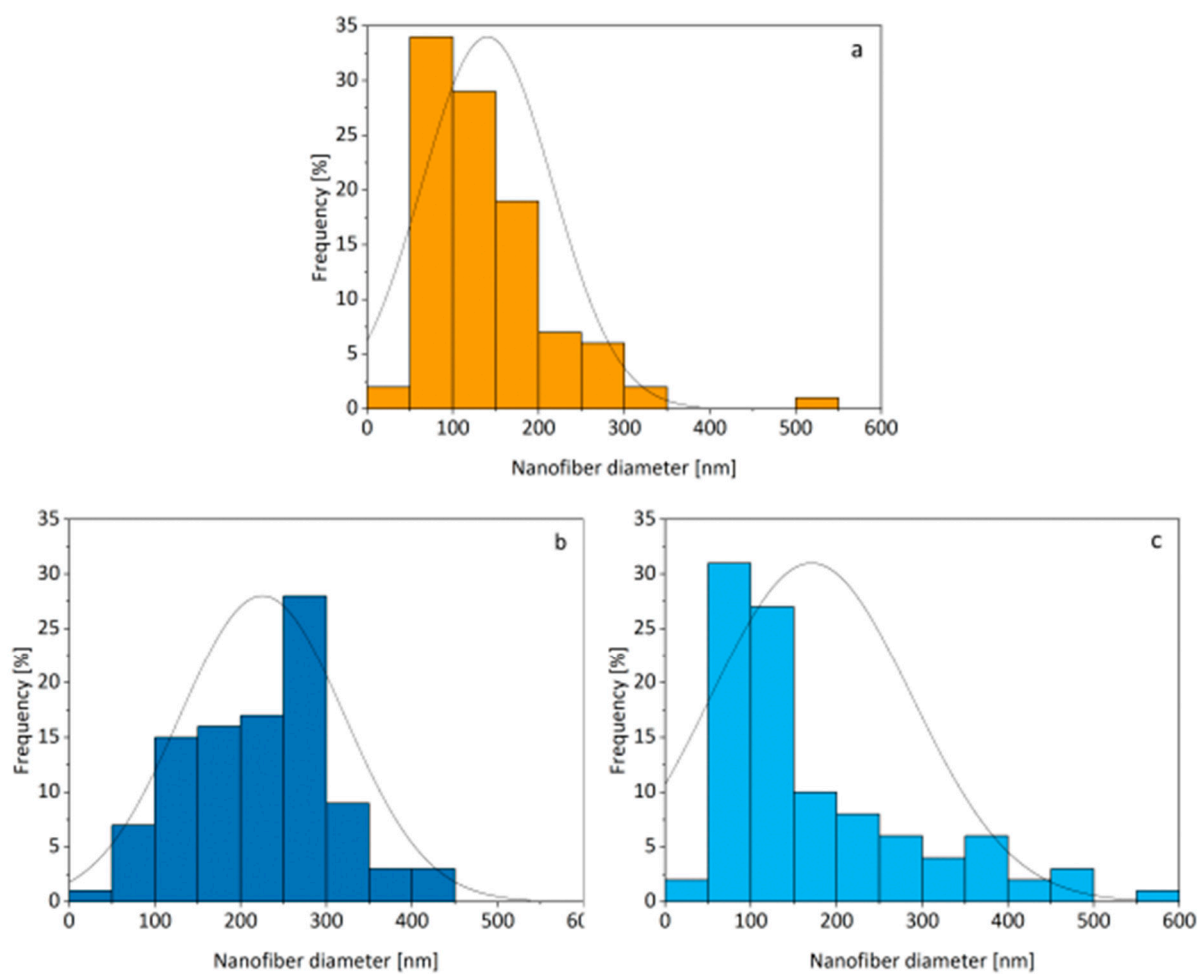

**Figure S5.** Histogram showing the nanofiber diameter distribution for (a) formulation B, (b) formulation C, and (c) formulation C<sub>0</sub>.

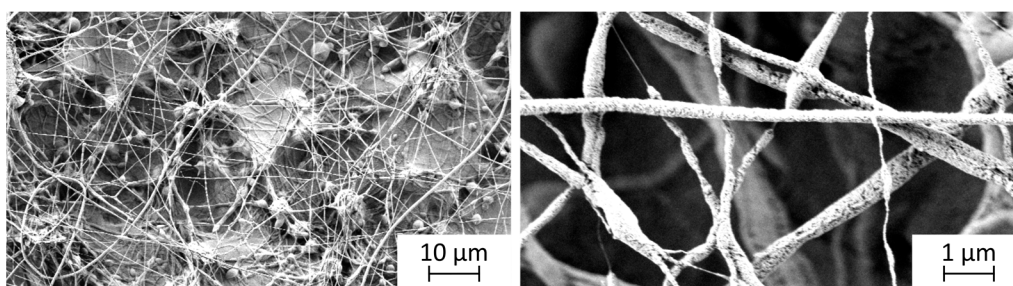

**Figure S6.** Representative SEM images of the dark central part of the electrospun product of formulation C at lower (left) and higher (right) magnification.

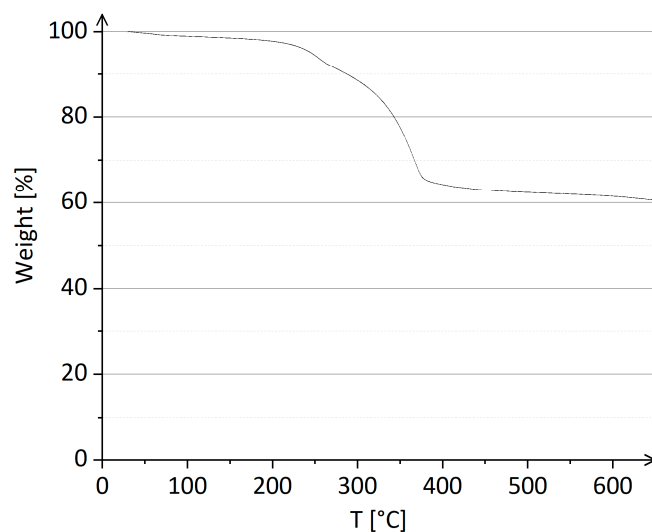

**Figure S7.** Representative graph of the weight loss during the TGA of the electrospun product with 65 % (w/w) SPION content.

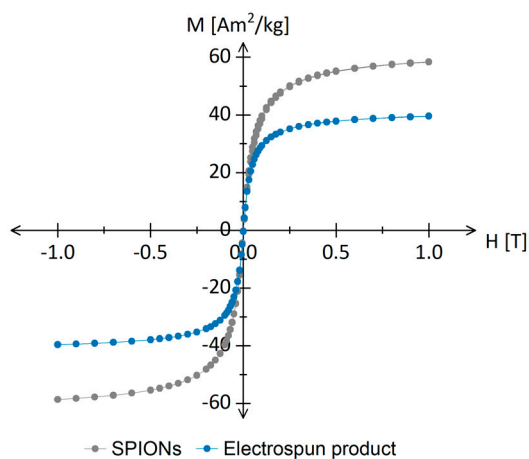

**Figure S8.** Representative graph of the magnetization (M) as a function of the magnetic field (H) for the initial SPIONs and electrospun product.

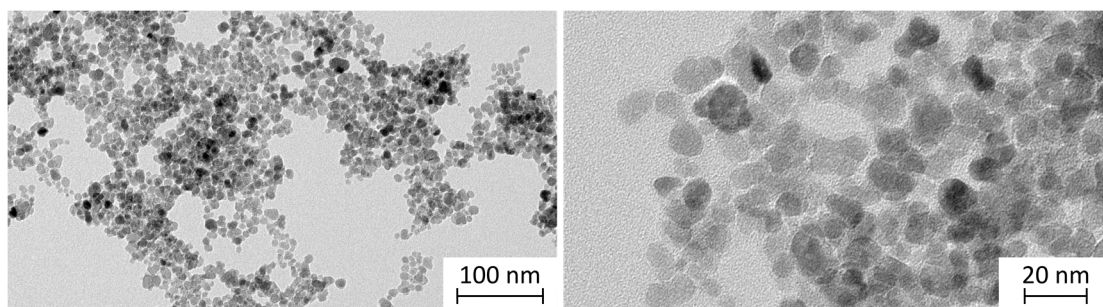

**Figure S9.** Representative TEM images of reconstituted SPIONs at lower (left) and higher (right) magnification.
